# Supplementary material for: MicroRNA-214 Suppresses Osteogenic Differentiation of Human Periodontal Ligament Stem Cells by Targeting ATF4
Source: Hindawi journal article supplement (doi:10.1155/2017/3028647), 2017-01-01
Supplement: f1 [file 3028647.f1.pdf]

## Supplemental Figure

a

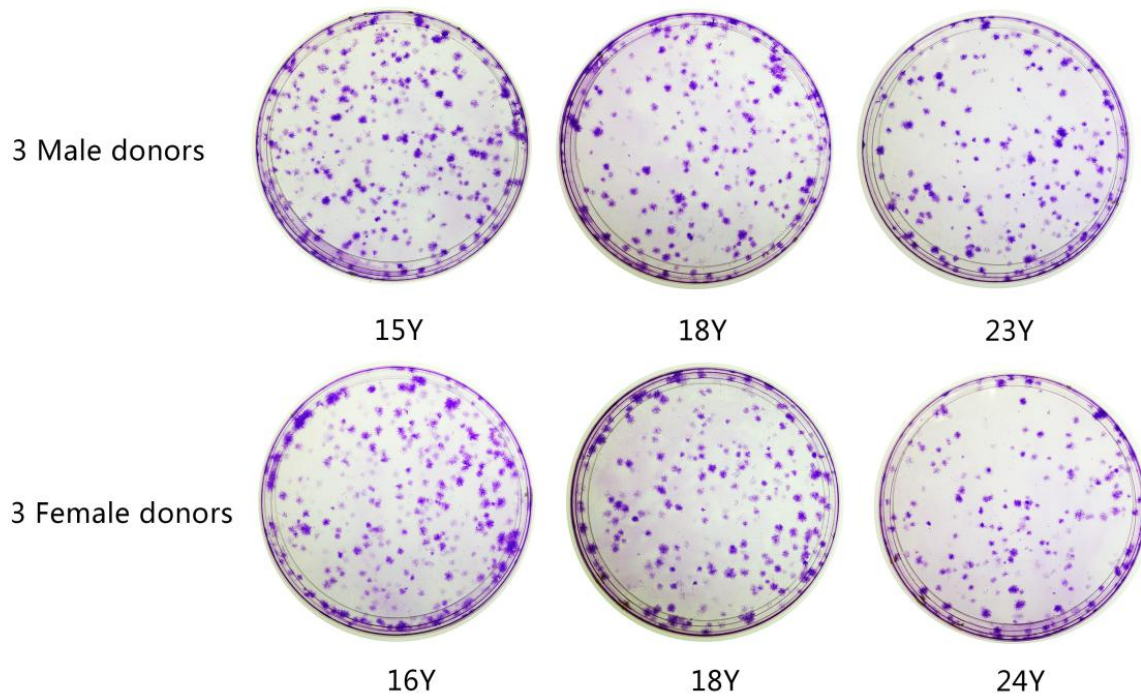

b

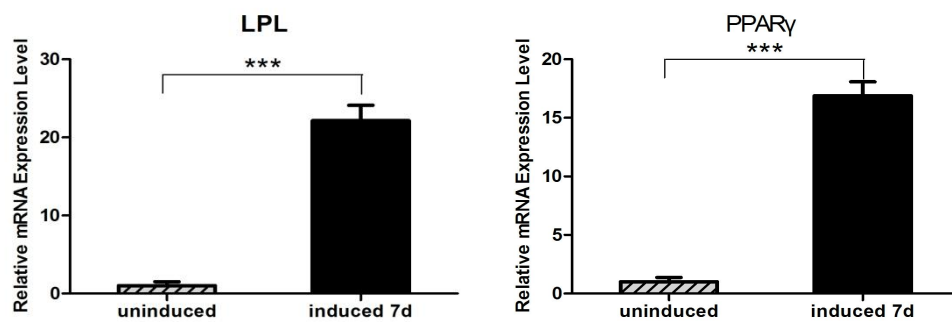

Figure S1. Characteristics of human periodontal ligament stem cells (hPDLSCs).

Related to Figure 1.

(a) CFU-F assays of 3 men and 3 women selected from the donors according to comparable age.

(b) Adipogenic induction was verified by increased expression of LPL and PPAR $\gamma$  in mRNA level. \*\*\* $p < 0.001$ .
